# Supplementary material for: Assessment of Knowledge, Attitudes, and Practices Related to Injection Site Complications Among Animal Health Providers in Small Ruminants in Kumasi, Ghana
Source: Research Square preprint supplement (doi:10.21203/rs.3.rs-8659048/v1), 2026-02-04
Supplement: Supplementary file 1 [file fc2939c4dbc0671d719cc440.docx]

**ASSESSMENT OF KNOWLEDGE, ATTITUDES, AND PRACTICES OF VETERINARIANS, PARAVETERINARIANS, AND ANIMAL HERDERS ON INJECTION SITE COMPLICATIONS IN SMALL RUMINANTS IN KUMASI, ASHANTI REGION**

**SECTION 1: DEMOGRAPHIC INFORMATION**

| **Item** | **Response** |
| --- | --- |
| 1. Name (Optional) | __________________________ |
| 2. Age | ___ |
| 3. Gender | ☐ Male ☐ Female |
| 4. Occupation | ☐ Veterinarian ☐ Paraveterinarian ☐ Animal Herder ☐ Other: __________ |
| 5. Years of Experience with Small Ruminants | ☐ < 1 year ☐ 1–5 years ☐ 6–10 years ☐ >10 years |
| 6. Location (Community/Town) | __________________________ |

**SECTION 2: KNOWLEDGE**

1. **Awareness of Injection Techniques**

| **Statement** | **Yes** | **No** |
| --- | --- | --- |
| 1. Are you aware of the different types of injections (IM, SC, IV)? | ☐ | ☐ |
| 2. Do you know the correct anatomical sites for each type of injection in small ruminants? | ☐ | ☐ |
| 1. Have you received any formal training on administering injections in small ruminants?   If yes what level__________________________ | ☐ | ☐ |
| 4. Do you clean the injection site before administration? | ☐ | ☐ |
| 5. Do you regularly rotate injection sites to prevent tissue damage? | ☐ | ☐ |

1. **Anatomical Knowledge of drug administration**

| **Question** | **Response Options** |
| --- | --- |
| 1. Do you fully know what SC, IM, and IV represent? | ☐ Yes, fully ☐ Partially ☐ No, not really ☐ Not sure |
| 2. When giving a subcutaneous (SC) injection, do you inject into loose skin? | ☐ Always ☐ Sometimes ☐ Rarely ☐ Never |
| 3. When giving an intramuscular (IM) injection, do you inject around the neck region? | ☐ Always ☐ Sometimes ☐ Rarely ☐ Never |
| 4. When giving an intravenous (IV) injection, do you inject into the jugular groove? | ☐ Always ☐ Sometimes ☐ Rarely ☐ Never |

1. **Knowledge of Complications**

| **Possible Complications** | **Aware** | **Not Aware** |
| --- | --- | --- |
| 1. Abscess formation | ☐ | ☐ |
| 2. Swelling or edema at injection site | ☐ | ☐ |
| 3. Muscle necrosis | ☐ | ☐ |
| 4. Nerve damage or lameness | ☐ | ☐ |
| 5. Injection site fibrosis | ☐ | ☐ |
| 6. Anaphylactic reaction | ☐ | ☐ |
| 7. Localized pain or discomfort | ☐ | ☐ |
| 8. Contamination leading to infection | ☐ | ☐ |
| 9. Improper drug absorption | ☐ | ☐ |

1. **Have you observed the following complications after administering VACCINES or ANTIBIOTICS in small ruminants?**
   (Tick only one that apply in each column)

| **Complication Type** | **Vaccines** | **Antibiotics** |
| --- | --- | --- |
| Abscess | ☐ | ☐ |
| Swelling/Edema | ☐ | ☐ |
| Damaged skin/muscle | ☐ | ☐ |
| Nerve damage/lameness | ☐ | ☐ |
| Hardened/thick tissue | ☐ | ☐ |
| Anaphylactic reaction | ☐ | ☐ |
| Localized pain/discomfort | ☐ | ☐ |
| Infection/contamination | ☐ | ☐ |
| Improper absorption | ☐ | ☐ |
| Tissue necrosis/death | ☐ | ☐ |

**SECTION 3: ATTITUDES**

**Attitudes Towards Injection Practices and Meat Quality**

| **Question / Attitude Indicator** | **Response Options** |
| --- | --- |
| 1. Do you support the use of aseptic techniques when administering injections? | ☐ Strongly agree ☐ Agree ☐ Disagree ☐ Strongly disagree |
| 2. Do you consider observing the withdrawal period after drug administration important? | ☐ Strongly agree ☐ Agree ☐ Disagree ☐ Strongly disagree |
| 3. Are you concerned that improper injections could affect meat quality? | ☐ Strongly agree ☐ Agree ☐ Disagree ☐ Strongly disagree |
| 4. Are you aware that vaccines can cause injection site lesions? | ☐ Strongly agree ☐ Agree ☐ Disagree ☐ Strongly disagree |
| 5. Do you understand that antimicrobial injections can cause injection site lesions? | ☐ Strongly agree ☐ Agree ☐ Disagree ☐ Strongly disagree |

**SECTION 4: PRACTICE**

1. **Commonly Used Anatomical Injection Sites and Lesion Prevalence**

| **Question** | **Response Options** |
| --- | --- |
| 1. Which anatomical site do you MOST OFTEN use when administering injections in small ruminants? (Select only one) | ☐ Cervical muscles (Neck) ☐ Forelimb muscles (Shoulder) ☐ Hindlimb muscles (Thigh) ☐ Gluteal muscles |
| 2. In your experience, at which anatomical sites do you MOST OFTEN detect injection site lesions (abscesses, swelling, fibrosis, necrosis, etc.)? (Select only one) | ☐ Hindlimb muscles (Thigh) ☐ Gluteal muscles ☐ Forelimb muscles (Shoulder) ☐ Cervical muscles (Neck) |

1. **Practice Assessment**

| **Practice** | **Always** | **Sometimes** | **Never** |
| --- | --- | --- | --- |
| 1. Use new sterile needles and syringes for each animal | ☐ | ☐ | ☐ |
| 2. Use correct injection technique (IM, SC, IV) based on drug instructions | ☐ | ☐ | ☐ |
| 3. Dispose of used needles and syringes properly | ☐ | ☐ | ☐ |
| 4. Monitor animals after injection for signs of complications | ☐ | ☐ | ☐ |
| 5. Report complications to a veterinarian immediately | ☐ | ☐ | ☐ |

**c) Injection Site Selection**

**B C**

**
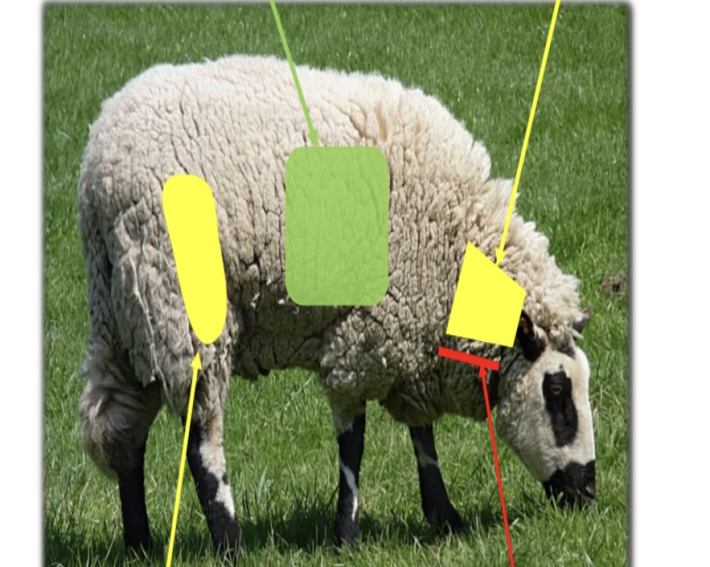

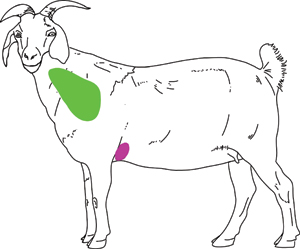
**

**A D**

| **Question** | **Response (✓/✗)** |
| --- | --- |
| Do you inject **in the neck region** of the animal? |  |
| Do you inject **in the thigh or hindquarter**? |  |
| Do you inject **in the brisket or chest area**? |  |
| Do you select the site based on **meat value preservation**? |  |
